# Supplementary material for: Comprehensive insights on how 2,4-dichlorophenoxyacetic acid retards senescence in post-harvest citrus fruits using transcriptomic and proteomic approaches
Source: PubMed Central journal article supplement (PMC3883282; doi:10.1093/jxb/ert344), 2013-11-08
Supplement: supp_ert344_jexbot103507_file002.pdf [file supp_ert344_jexbot103507_file002.pdf]

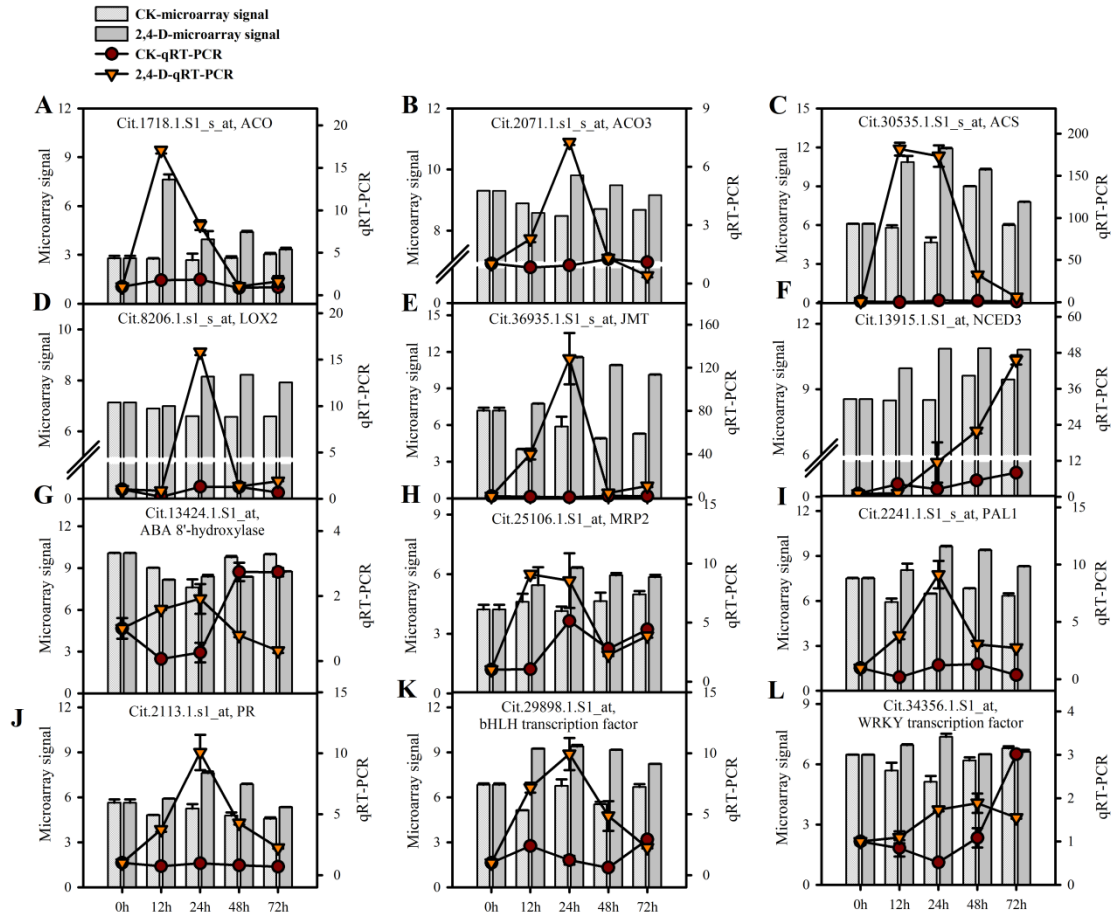

Supplemental Fig. 1. Validation of the microarray expression data using quantitative real-time PCR. Twelve interesting genes were selected: A is Cit.1718.1.S1\_s\_at, *ACO*; B is Cit.2071.1.s1\_s\_at, *ACO3*; C is Cit.30535.1.S1\_s\_at, *ACS*; D is Cit.8206.1.s1\_s\_at, *LOX2*; E is Cit.36935.1.S1\_s\_at, *JMT*; F is Cit.13915.1.S1\_at, *NCED3*; G is Cit.13424.1.S1\_at, *ABA 8'-hydroxylase*; H is Cit.25106.1.S1\_at, *MRP2*; I is Cit.2241.1.S1\_s\_at, *PAL1*; J is Cit.2113.1.s1\_at, *PR*; K is Cit.29898.1.S1\_at, *basic helix-loop-helix transcription factor*; L is Cit.34356.1.S1\_at, *WRKY* transcription factor.

Supplemental Table 1. Differential expressions and annotations of hormone metabolism and signal transduction related genes. Blank spaces indicate genes without change.

| Probe set                                                  | Anotation                          | AGI         | Log <sub>2</sub> ratio of treatment/CK |              |              |              |
|------------------------------------------------------------|------------------------------------|-------------|----------------------------------------|--------------|--------------|--------------|
|                                                            |                                    |             | 12 HPT                                 | 24 HPT       | 48 HPT       | 72 HPT       |
| <i>Auxin synthesis-degradation and signal transduction</i> |                                    |             |                                        |              |              |              |
| Cit.25129.1.S1_at                                          | AFB5                               | AT5g49980   |                                        | <b>1.19</b>  |              |              |
| Cit.12252.1.S1_at                                          | GH3.1                              | AT2g14960   | <b>1.71</b>                            | <b>2.41</b>  | <b>2.56</b>  | <b>2.39</b>  |
| Cit.23036.1.S1_s_at                                        | GH3.1                              | AT2g14960   | <b>2.37</b>                            | <b>5.28</b>  | <b>4.24</b>  | <b>2.92</b>  |
| Cit.5201.1.S1_at                                           | GH3.1                              | AT2g14960   | <b>1.90</b>                            | <b>4.48</b>  | <b>3.80</b>  | <b>2.70</b>  |
| Cit.23488.1.S1_s_at                                        | AGD2                               | AT1g60680   | <b>-1.39</b>                           | <b>-1.87</b> | <b>-1.21</b> | <b>-1.25</b> |
| Cit.9559.1.S1_s_at                                         | AGD2                               | AT1g60680   |                                        | <b>-1.19</b> |              |              |
| Cit.9560.1.S1_x_at                                         | ATB2                               | AT1g60710   |                                        | <b>1.40</b>  |              |              |
| Cit.24664.1.S1_at                                          | Aldo/keto reductase family protein | AT1g60690   | <b>-1.42</b>                           | <b>-1.96</b> |              |              |
| Cit.11374.1.S1_s_at                                        | IAR3                               | AT1g51760   |                                        | <b>1.29</b>  |              |              |
| Cit.36875.1.S1_at                                          | ILL2                               | AT5g56660   |                                        | <b>1.16</b>  |              |              |
| Cit.12691.1.S1_s_at                                        | JAR1                               | AT2g46370   | <b>1.49</b>                            | <b>1.37</b>  |              |              |
| Cit.15048.1.S1_at                                          | ARF4                               | AT5g60450   | <b>-1.25</b>                           | <b>-1.37</b> |              |              |
| Cit.15048.1.S1_s_at                                        | ARF4                               | AT5g60450   | <b>-1.10</b>                           |              |              |              |
| Cit.14887.1.S1_at                                          | ARF6                               | AT1g30330   |                                        | <b>1.06</b>  |              |              |
| Cit.14051.1.S1_s_at                                        | ARF10                              | AT2g28350   |                                        |              | <b>1.09</b>  |              |
| Cit.17407.1.S1_at                                          | IAA4                               | AT5g43700   |                                        | <b>-1.16</b> |              |              |
| Cit.5636.1.S1_s_at                                         | IAA4                               | AT5g43700   | <b>1.40</b>                            | <b>2.09</b>  | <b>1.54</b>  |              |
| Cit.8972.1.S1_s_at                                         | IAA16                              | AT5g43700   | <b>-1.57</b>                           |              |              |              |
| Cit.8403.1.S1_s_at                                         | Similar to unknown protein         | AT3g15450.1 | <b>1.33</b>                            |              |              |              |
| Cit.13706.1.S1_s_at                                        | Similar to unknown protein         | AT3g15450.1 | <b>1.44</b>                            | <b>1.77</b>  |              |              |
| Cit.18006.1.S1_at                                          | Similar to unknown protein         | AT3g15450.1 | <b>1.24</b>                            | <b>1.90</b>  |              |              |
| Cit.17330.1.S1_at                                          | Auxin-responsive family protein    | AT2g46690   | <b>-1.56</b>                           | <b>-1.51</b> |              |              |
| Cit.29704.1.S1_s_at                                        | Auxin-responsive family protein    | AT2g46690   | <b>-1.15</b>                           |              | <b>-1.31</b> |              |

|                                                                      |                                 |           |              |              |              |             |  |
|----------------------------------------------------------------------|---------------------------------|-----------|--------------|--------------|--------------|-------------|--|
| Cit.5615.1.S1_s_at                                                   | Auxin-responsive family protein | AT1g75590 |              | <b>-1.07</b> | <b>-1.41</b> |             |  |
| Cit.11105.1.S1_s_at                                                  | Auxin-responsive family protein | AT3g25290 |              | <b>-1.27</b> |              |             |  |
| Cit.11178.1.S1_s_at                                                  | Auxin-responsive family protein | AT5g35735 |              | <b>1.02</b>  |              |             |  |
| Cit.10697.1.S1_s_at                                                  | Auxin-responsive family protein | AT5g20820 | <b>1.59</b>  | <b>1.17</b>  |              |             |  |
| Cit.15712.1.S1_at                                                    | Auxin-responsive family protein | AT1g72430 | <b>2.37</b>  | <b>1.06</b>  | <b>1.32</b>  |             |  |
| <b><i>ABA synthesis-degradation and signal transduction</i></b>      |                                 |           |              |              |              |             |  |
| Cit.16305.1.S1_at                                                    | NCED4                           | AT4g19170 |              | <b>-1.98</b> |              |             |  |
| Cit.17235.1.S1_s_at                                                  | NCED5                           | AT1g30100 | <b>2.25</b>  | <b>1.94</b>  |              |             |  |
| Cit.29734.1.S1_s_at                                                  | NCED3                           | AT3g14440 | <b>2.03</b>  | <b>2.10</b>  |              |             |  |
| Cit.8156.1.S1_at                                                     | NCED4                           | AT4g19170 | <b>2.17</b>  | <b>1.21</b>  | <b>1.32</b>  |             |  |
| Cit.13915.1.S1_at                                                    | NCED3                           | AT3g14440 | <b>1.47</b>  | <b>2.34</b>  | <b>1.26</b>  | <b>1.37</b> |  |
| Cit.3748.1.S1_s_at                                                   | ABF4                            | AT3g19290 |              | <b>-1.04</b> |              |             |  |
| Cit.15430.1.S1_at                                                    | PP2C family protein             | AT3g12620 |              | <b>1.37</b>  |              |             |  |
| Cit.31326.1.S1_at                                                    | PP2C, putative                  | AT3g62260 |              | <b>1.18</b>  |              |             |  |
| Cit.29625.1.S1_at                                                    | PP2C, putative                  | AT2g30020 | <b>-1.81</b> | <b>1.57</b>  | <b>-1.55</b> |             |  |
| Cit.12329.1.S1_at                                                    | PP2C, putative                  | AT5g53140 |              | <b>-1.44</b> | <b>-1.25</b> |             |  |
| Cit.12329.1.S1_s_at                                                  | PP2C, putative                  | AT5g53140 |              | <b>-1.49</b> | <b>-1.22</b> |             |  |
| Cit.31435.1.S1_at                                                    | PP2C, putative                  | AT5g53140 |              | <b>-1.06</b> | <b>-1.10</b> |             |  |
| Cit.4061.1.S1_s_at                                                   | PP2C, putative                  | AT1g07160 | <b>-1.34</b> |              | <b>-1.40</b> |             |  |
| Cit.17914.1.S1_at                                                    | PP2C-related                    | AT1g32640 |              | <b>-1.04</b> |              |             |  |
| Cit.15850.1.S1_at                                                    | SNRK2.6                         | AT4g33950 | <b>1.02</b>  | <b>1.24</b>  |              |             |  |
| Cit.13263.1.S1_s_at                                                  | HVA22E                          | AT5g50720 |              | <b>-1.60</b> |              |             |  |
| Cit.3274.1.S1_s_at                                                   | HVA22 family protein            | AT5g42560 | <b>-1.18</b> | <b>-1.10</b> |              |             |  |
| Cit.34429.1.S1_s_at                                                  | GRAM domain-containing protein  | AT5g23370 |              | <b>1.14</b>  |              |             |  |
| <b><i>Ethylene synthesis-degradation and signal transduction</i></b> |                                 |           |              |              |              |             |  |
| Cit.4491.1.S1_at                                                     | ACC synthase ACS6               | AT4g11280 |              | <b>1.21</b>  |              |             |  |
| Cit.18037.1.S1_at                                                    | ACC synthase ACS1               | AT3g61510 | <b>1.92</b>  | <b>4.36</b>  | <b>1.15</b>  | <b>2.03</b> |  |
| Cit.30535.1.S1_at                                                    | ACC oxidase ACO4                | AT1g05010 |              | <b>1.14</b>  |              |             |  |
| Cit.21723.1.S1_s_at                                                  | ACC oxidase ACO4                | AT1g05010 | <b>4.58</b>  | <b>6.74</b>  | <b>1.18</b>  | <b>1.64</b> |  |
| Cit.30535.1.S1_s_at                                                  | ACC oxidase ACO4                | AT1g05010 | <b>5.07</b>  | <b>7.23</b>  | <b>1.26</b>  | <b>1.80</b> |  |

|                     |                                                      |             |              |              |              |              |
|---------------------|------------------------------------------------------|-------------|--------------|--------------|--------------|--------------|
| Cit.20188.1.S1_at   | 2OG-Fe(II) oxygenase family protein                  | AT1g49390   | <b>-1.56</b> | <b>-2.68</b> | <b>-1.29</b> | <b>-1.00</b> |
| Cit.23448.1.S1_s_at | 2OG-Fe(II) oxygenase family protein                  | AT1g49390   | <b>-1.66</b> | <b>-2.61</b> | <b>-1.33</b> |              |
| Cit.23448.1.S1_x_at | 2OG-Fe(II) oxygenase family protein                  | AT1g49390   | <b>-1.38</b> | <b>-1.56</b> |              |              |
| Cit.11435.1.S1_s_at | 2OG-Fe(II) oxygenase family protein                  | AT3g19000   |              |              | <b>1.22</b>  | <b>1.50</b>  |
| Cit.6827.1.S1_x_at  | 2OG-Fe(II) oxygenase family protein                  | AT1g17010   |              | <b>1.32</b>  |              |              |
| Cit.5281.1.S1_at    | 2OG-Fe(II) oxygenase family protein                  | AT5g05600   | <b>1.82</b>  | <b>2.18</b>  |              | <b>1.32</b>  |
| Cit.13128.1.S1_s_at | 2OG-Fe(II) oxygenase family protein                  | AT5g24530   | <b>1.18</b>  | <b>1.37</b>  | <b>2.30</b>  |              |
| Cit.18154.1.S1_at   | 2OG-Fe(II) oxygenase family protein                  | AT5g20400   | <b>2.81</b>  | <b>1.39</b>  | <b>1.32</b>  |              |
| Cit.15355.1.S1_at   | 2OG-Fe(II) oxygenase family protein                  | AT4g10490   | <b>2.06</b>  | <b>2.09</b>  | <b>1.87</b>  | <b>1.41</b>  |
| Cit.5282.1.S1_at    | 2OG-Fe(II) oxygenase family protein                  | AT5g05600   | <b>1.93</b>  | <b>2.96</b>  | <b>1.31</b>  | <b>1.70</b>  |
| Cit.5316.1.S1_at    | 2OG-Fe(II) oxygenase family protein                  | AT5g05600   | <b>4.96</b>  | <b>6.35</b>  | <b>5.80</b>  | <b>3.43</b>  |
| Cit.14031.1.S1_at   | ERS1                                                 | AT2g40940   | <b>1.03</b>  |              |              |              |
| Cit.28131.1.S1_s_at | ETR2                                                 | AT3g23150   | <b>2.24</b>  | <b>2.48</b>  |              |              |
| Cit.22763.1.S1_s_at | ERF1                                                 | AT3g23240   | <b>4.56</b>  | <b>4.12</b>  | <b>-1.52</b> |              |
| Cit.4810.1.S1_at    | ERF1                                                 | AT3g23240   | <b>3.52</b>  | <b>3.65</b>  | <b>-2.54</b> |              |
| Cit.5984.1.S1_at    | ERF1                                                 | AT3g23240   | <b>3.10</b>  | <b>2.39</b>  |              |              |
| Cit.16636.1.S1_at   | ERF2                                                 | AT5g47220   | <b>1.83</b>  | <b>1.80</b>  | <b>1.15</b>  |              |
| Cit.5891.1.S1_at    | ERF2                                                 | AT5g47220   | <b>1.56</b>  | <b>2.02</b>  | <b>-1.72</b> |              |
| Cit.29533.1.S1_s_at | ERF6                                                 | AT4g17490   | <b>-1.01</b> |              | <b>-1.26</b> |              |
| Cit.14141.1.S1_s_at | ERF7                                                 | AT3g20310   |              |              | <b>-1.08</b> |              |
| Cit.11704.1.S1_s_at | ERF9                                                 | AT5g44210   |              |              | <b>-1.17</b> |              |
| Cit.17142.1.S1_s_at | ERF9                                                 | AT5g44210   |              |              | <b>-1.35</b> |              |
| Cit.16845.1.S1_at   | ERF12                                                | AT1g28360   | <b>1.52</b>  | <b>1.46</b>  |              |              |
| Cit.15228.1.S1_at   | ERF13                                                | AT2g44840   |              | <b>-1.31</b> |              | <b>-1.02</b> |
| Cit.2675.1.S1_s_at  | AP2 domain-containing transcription factor, putative | AT5g51190   |              | <b>1.19</b>  |              |              |
| Cit.14303.1.S1_at   | AP2 domain-containing transcription factor           | AT5g61590   | <b>1.44</b>  | <b>-0.67</b> | <b>-1.95</b> |              |
| Cit.22941.1.S1_at   | Similar to unknown protein                           | AT2g25190.1 |              | <b>-1.20</b> |              |              |
| Cit.14104.1.S1_at   | Similar to unknown protein                           | AT2g25190.1 |              | <b>-1.43</b> | <b>-1.40</b> |              |
| Cit.14104.1.S1_s_at | Similar to unknown protein                           | AT2g25190.1 |              | <b>-1.36</b> | <b>-1.18</b> |              |
| Cit.14104.1.S1_x_at | Similar to unknown protein                           | AT2g25190.1 |              | <b>-1.59</b> | <b>-1.23</b> |              |

|                                                                |                                               |           |              |              |              |             |
|----------------------------------------------------------------|-----------------------------------------------|-----------|--------------|--------------|--------------|-------------|
| Cit.18140.1.S1_at                                              | Universal stress protein family protein       | AT3g62550 |              | <b>-1.06</b> |              |             |
| Cit.5117.1.S1_at                                               | Universal stress protein family protein       | AT3g62550 | <b>1.06</b>  | <b>1.28</b>  |              |             |
| <b><i>JA synthesis-degradation and signal transduction</i></b> |                                               |           |              |              |              |             |
| Cit.9904.1.S1_s_at                                             | Lipoxygenase LOX2                             | AT3g45140 |              |              | <b>1.55</b>  |             |
| Cit.4573.1.S1_at                                               | Lipoxygenase LOX2                             | AT3g45140 |              | <b>2.17</b>  | <b>1.44</b>  |             |
| Cit.8206.1.S1_s_at                                             | Lipoxygenase LOX2                             | AT3g45140 |              | <b>1.55</b>  | <b>1.66</b>  | <b>1.33</b> |
| Cit.12474.1.S1_s_at                                            | Lipoxygenase, putative                        | AT1g72520 |              | <b>1.13</b>  |              |             |
| Cit.18017.1.S1_s_at                                            | Lipoxygenase, putative                        | AT1g72520 |              | <b>1.32</b>  |              |             |
| Cit.10444.1.S1_at                                              | CYP74B2                                       | AT4g15440 |              | <b>1.73</b>  | <b>1.41</b>  |             |
| Cit.10979.1.S1_at                                              | Allene oxide cyclase AOC4                     | AT1g13280 |              |              | <b>1.01</b>  |             |
| Cit.2071.1.S1_s_at                                             | Allene oxide cyclase AOC3                     | AT3g25780 |              | <b>1.33</b>  |              |             |
| Cit.14108.1.S1_at                                              | 12-Oxo-PDA-reductase OPR3                     | AT2g06050 |              | <b>1.29</b>  |              |             |
| Cit.10684.1.S1_at                                              | 12-Oxo-PDA-reductase OPR2                     | AT1g76690 | <b>3.69</b>  | <b>4.37</b>  |              |             |
| Cit.10685.1.S1_s_at                                            | 12-Oxo-PDA-reductase OPR2                     | AT1g76690 | <b>2.64</b>  | <b>3.59</b>  | <b>1.04</b>  |             |
| Cit.30497.1.S1_at                                              | JMT                                           | AT1g19640 |              | <b>2.02</b>  | <b>2.12</b>  | <b>1.07</b> |
| Cit.11410.1.S1_s_at                                            | Kelch repeat-containing protein               | AT3g07720 |              | <b>-1.36</b> |              |             |
| <b><i>SA synthesis-degradation and signal transduction</i></b> |                                               |           |              |              |              |             |
| Cit.12979.1.S1_at                                              | SAM:carboxyl methyltransferase family protein | AT5g66430 | <b>1.09</b>  |              |              |             |
| Cit.36935.1.S1_s_at                                            | JMT                                           | AT1g19640 | <b>3.75</b>  | <b>5.65</b>  | <b>6.03</b>  | <b>4.83</b> |
| <b><i>Other hormone related genes</i></b>                      |                                               |           |              |              |              |             |
| Cit.14413.1.S1_at                                              | DET2                                          | AT5g16010 | <b>1.18</b>  | <b>-1.91</b> |              |             |
| Cit.26842.1.S1_at                                              | DWF1                                          | AT3g19820 | <b>-1.51</b> | <b>-1.96</b> |              |             |
| Cit.33172.1.S1_at                                              | DWF4                                          | AT3g50660 |              | <b>1.25</b>  |              |             |
| Cit.26526.1.S1_at                                              | CYP90D1                                       | AT3g13730 |              | <b>1.06</b>  |              |             |
| Cit.10659.1.S1_s_at                                            | Sterol methyltransferase SMT1                 | AT5g13710 |              | <b>-1.05</b> |              |             |
| Cit.10660.1.S1_at                                              | Sterol methyltransferase SMT1                 | AT5g13710 |              | <b>-1.53</b> |              |             |
| Cit.22644.1.S1_at                                              | Isopentenyltransferase IPT3                   | AT3g63110 |              |              | <b>-1.06</b> |             |
| Cit.18362.1.S1_at                                              | Cytokinin oxidase CKX5                        | AT1g75450 | <b>1.02</b>  | <b>1.27</b>  |              |             |
| Cit.17149.1.S1_s_at                                            | Histidine kinase 1                            | AT2g17820 |              | <b>-1.19</b> |              |             |

|                     |                                          |           |              |              |                           |
|---------------------|------------------------------------------|-----------|--------------|--------------|---------------------------|
| Cit.32142.1.S1_at   | Histidine kinase CKII                    | AT2g47430 | <b>-1.57</b> |              |                           |
| Cit.25357.1.S1_at   | GA2OX8 (gibberellin 2-oxidase 8)         | AT4g21200 |              |              | <b>1.03</b>               |
| Cit.18766.1.S1_at   | GA2OX2                                   | AT1g30040 | <b>1.54</b>  |              |                           |
| Cit.25361.1.S1_s_at | Scarecrow-like transcription factor SCL8 | AT5g52510 |              | <b>-1.14</b> |                           |
| Cit.10032.1.S1_x_at | GAST1 protein homolog GASA1              | AT1g75750 |              |              | <b>-1.41</b>              |
| Cit.35768.1.S1_s_at | GAST1 protein homolog GASA5              | AT3g02885 |              |              | <b>1.99</b>               |
| Cit.11064.1.S1_at   | GAST1 protein homolog GASA4              | AT5g15230 |              |              | <b>1.07</b> <b>1.14</b>   |
| Cit.9890.1.S1_s_at  | Gibberellin-regulated family protein     | AT2g14900 |              |              | <b>-2.11</b> <b>-1.26</b> |
| Cit.30950.1.S1_at   | Gibberellin-regulated family protein     | AT2g30810 |              | <b>1.27</b>  |                           |

Supplemental Table S2. Differential expressions and annotations of stress-responsive genes at 48 and 72 HPT.

| Probe set                          | Anotation                                               | AGI       | Log <sub>2</sub> ratio of treatment/CK |              |
|------------------------------------|---------------------------------------------------------|-----------|----------------------------------------|--------------|
|                                    |                                                         |           | 48 HPT                                 | 72 HPT       |
| <i>Biotic stress related genes</i> |                                                         |           |                                        |              |
| Cit.14913.1.S1_s_at                | Acidic endochitinase (CHIB1)                            | AT5g24090 | <b>1.51</b>                            | <b>1.35</b>  |
| Cit.20412.1.S1_s_at                | CHI-B                                                   | AT3g12500 | <b>2.00</b>                            | <b>1.55</b>  |
| Cit.20412.1.S1_s_at                | CHI-B                                                   | AT3g12500 | <b>2.00</b>                            | <b>1.55</b>  |
| Cit.10594.1.S1_at                  | Chitinase (CHI) class IV                                | AT3g54420 |                                        | <b>1.41</b>  |
| Cit.15242.1.S1_at                  | Chitinase (CHI) class IV                                | AT3g54420 | <b>2.07</b>                            | <b>3.03</b>  |
| Cit.39297.1.S1_at                  | Disease resistance family protein                       | AT1g47890 | <b>1.34</b>                            |              |
| Cit.25559.1.S1_at                  | Disease resistance protein (CC-NBS-LRR class), putative | AT1g58410 | <b>1.22</b>                            |              |
| Cit.12682.1.S1_at                  | Disease resistance protein (NBS-LRR class), putative    | AT3g14460 | <b>-1.29</b>                           |              |
| Cit.33610.1.S1_at                  | Disease resistance-responsive protein-related           | AT1g58170 | <b>1.69</b>                            | <b>1.17</b>  |
| Cit.30907.1.S1_at                  | Glycosyl hydrolase family 19 protein                    | AT4g19800 | <b>1.51</b>                            | <b>1.33</b>  |
| Cit.27793.1.S1_at                  | Leucine-rich repeat family protein                      | AT1g74190 | <b>1.46</b>                            | <b>1.07</b>  |
| Cit.30114.1.S1_at                  | Leucine-rich repeat family protein                      | AT1g74180 | <b>-1.51</b>                           | <b>-1.15</b> |
| Cit.15404.1.S1_at                  | Pathogenesis-related protein, putative                  | AT4g33720 | <b>6.02</b>                            | <b>5.52</b>  |
| Cit.11548.1.S1_at                  | Pathogenesis-related thaumatin family protein           | AT1g20030 | <b>2.43</b>                            | <b>3.55</b>  |
| Cit.12699.1.S1_s_at                | Pathogenesis-related thaumatin family protein           | AT1g20030 | <b>-1.06</b>                           |              |
| Cit.753.1.S1_x_at                  | PR4                                                     | AT3g04720 | <b>2.06</b>                            | <b>2.26</b>  |
| Cit.21717.1.S1_at                  | PR4                                                     | AT3g04720 | <b>1.29</b>                            | <b>1.02</b>  |
| Cit.22589.1.S1_s_at                | Protease inhibitor, putative                            | AT2g38870 | <b>2.45</b>                            | <b>3.30</b>  |
| Cit.8464.1.S1_s_at                 | Protease inhibitor, putative                            | AT2g38870 | <b>1.04</b>                            | <b>1.47</b>  |
| Cit.6364.1.S1_s_at                 | Secretory protein, putative                             | AT2g15220 | <b>1.36</b>                            | <b>1.11</b>  |
| Cit.21195.1.S1_at                  | Serine protease inhibitor                               | AT2g38870 |                                        | <b>1.27</b>  |
| Cit.19521.1.S1_s_at                | Transferase family protein                              | AT5g17540 | <b>1.09</b>                            |              |
| Cit.31057.1.S1_s_at                | Transferase family protein                              | AT5g17540 | <b>2.86</b>                            |              |

|                                            |                                               |           |              |              |
|--------------------------------------------|-----------------------------------------------|-----------|--------------|--------------|
| Cit.16882.1.S1_x_at                        | Trypsin and protease inhibitor family protein | AT1g17860 | <b>1.22</b>  |              |
| Cit.16962.1.S1_x_at                        | Trypsin and protease inhibitor family protein | AT1g17860 | <b>1.41</b>  | <b>1.38</b>  |
| Cit.19362.1.S1_x_at                        | Trypsin and protease inhibitor family protein | AT1g17860 | <b>1.27</b>  |              |
| Cit.22421.1.S1_x_at                        | Trypsin and protease inhibitor family protein | AT1g17860 | <b>1.89</b>  | <b>1.93</b>  |
| Cit.29321.1.S1_x_at                        | Trypsin and protease inhibitor family protein | AT1g17860 | <b>2.56</b>  | <b>3.59</b>  |
| Cit.29325.1.S1_x_at                        | Trypsin and protease inhibitor family protein | AT1g17860 | <b>1.23</b>  |              |
| Cit.29356.1.S1_x_at                        | Trypsin and protease inhibitor family protein | AT1g17860 | <b>2.64</b>  | <b>4.22</b>  |
| Cit.29368.1.S1_x_at                        | Trypsin and protease inhibitor family protein | AT1g17860 | <b>2.27</b>  | <b>4.12</b>  |
| Cit.29373.1.S1_s_at                        | Trypsin and protease inhibitor family protein | AT1g17860 | <b>1.73</b>  | <b>2.69</b>  |
| Cit.35442.1.S1_x_at                        | Trypsin and protease inhibitor family protein | AT1g17860 | <b>2.11</b>  | <b>4.85</b>  |
| <b><i>Abiotic stress related genes</i></b> |                                               |           |              |              |
| Cit.15338.1.S1_at                          | HSP17.4                                       | AT3g46230 | <b>-3.11</b> | <b>-2.13</b> |
| Cit.12593.1.S1_at                          | HSP26.5-P                                     | AT1g52560 | <b>-1.46</b> | <b>-1.25</b> |
| Cit.26433.1.S1_s_at                        | HSP26.5-P                                     | AT1g52560 | <b>-1.59</b> | <b>-1.16</b> |
| Cit.13558.1.S1_s_at                        | HSP70B                                        | AT1g16030 | <b>-1.15</b> |              |
| Cit.35378.1.S1_s_at                        | DNAJ heat shock family protein                | AT2g20560 | <b>-1.16</b> | <b>-1.05</b> |
| Cit.13005.1.S1_at                          | GRP2B (glycine-rich protein 2B)               | AT2g21060 | <b>-1.17</b> |              |
| Cit.30437.1.S1_s_at                        | RCI2B (rare-cold-inducible 2B)                | AT3g05890 | <b>-1.30</b> |              |
| Cit.8878.1.S1_at                           | Enoyl-CoA hydratase/isomerase family protein  | AT1g06550 |              | <b>1.09</b>  |
| Cit.8648.1.S1_at                           | Germin-like protein, putative                 | AT5g39120 |              | <b>1.11</b>  |
| Cit.29439.1.S1_at                          | wound-responsive family protein               | AT4g10270 |              | <b>1.52</b>  |
| Cit.29721.1.S1_at                          | wound-responsive family protein               | AT4g10270 | <b>1.69</b>  | <b>2.58</b>  |
| Cit.5237.1.S1_s_at                         | wound-responsive family protein               | AT4g10270 | <b>1.47</b>  | <b>2.61</b>  |
| Cit.10014.1.S1_s_at                        | wound-responsive family protein               | AT4g10270 | <b>1.31</b>  | <b>1.87</b>  |



Supplementary Table 3. Identification of the differentially expressed proteins in peel of Olinda orange fruit. The bold rows represent the proteins co-expressed at both transcriptional and posttranscriptional levels with similar patterns. Letters of a, b, c, d, and e represent five different expression modes: a, proteins accumulated at one or more time points of 12, 24, 48 and 72 HPT; b, proteins decreased at one or more time points; c, proteins accumulated at 12 or 24 HPT then decreased at 48 or 72 HPT; d, proteins decreased at 12 or 24 HPT then accumulated at 48 or 72 HPT; e, proteins with complex expression modes.

| Spot                   | Accession number   | Annotation                      | Species                  | Theo. Mr (kD)/pI  | Exp. Mr (kD)/pI   | Protein score | Protein score C.I.% | Expression Changes (0h-12h-24h-48h-72h)                                               |
|------------------------|--------------------|---------------------------------|--------------------------|-------------------|-------------------|---------------|---------------------|---------------------------------------------------------------------------------------|
| <b>Stress response</b> |                    |                                 |                          |                   |                   |               |                     |                                                                                       |
| d1                     | Gi 218830719       | Osmotin 34                      | <i>Citrus clementina</i> | 21.24/5.85        | 25.57/4.84        | 171           | 100                 | 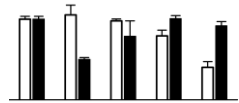   |
| a25                    | Gi 63074640        | Chitinase                       | <i>Citrus clementina</i> | 12.58/5.13        | 41.58/4.54        | 82            | 98.10               |   |
| <b>a26</b>             | <b>Gi 87299377</b> | <b>Miraculin-like protein 2</b> | <i>Citrus jambhiri</i>   | <b>24.45/5.61</b> | <b>74.65/5.55</b> | <b>121</b>    | <b>100</b>          |  |
| c3                     | Gi 30575570        | HSP19 class II                  | <i>Citrus X paradisi</i> | 11.19/ 8.01       | 15.47/5.82        | 197           | 100                 |  |

|     |              |                              |                             |            |            |     |     |                                                                                       |
|-----|--------------|------------------------------|-----------------------------|------------|------------|-----|-----|---------------------------------------------------------------------------------------|
| e1  | Gi 188307148 | Mitochondrial HSP23.5        | <i>Citrus reticulata</i>    | 32.43/9.53 | 19.81/4.93 | 284 | 100 | 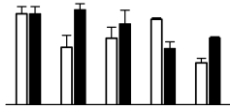   |
| e2  | Gi 218812876 | Mitochondrial HSP23.5        | <i>Citrus medica</i>        | 23.98/5.71 | 20.84/4.84 | 130 | 100 |    |
| b4  | Gi 46212644  | HSA32                        | <i>Citrus sinensis</i>      | 30.65/5.69 | 35.61/6.45 | 117 | 100 |    |
| e5  | Gi 63104305  | HSP21                        | <i>Citrus X paradisi</i>    | 33.20/8.39 | 20.86/5.41 | 483 | 100 |    |
| e3  | Gi 16221     | Chaperonin HSP60             | <i>Arabidopsis thaliana</i> | 61.65/5.66 | 69.43/5.56 | 264 | 100 |    |
| a30 | Gi 2506277   | Chaperonin 60 beta           | <i>Pisum sativum</i>        | 63.29/5.85 | 68.70/5.37 | 398 | 100 |   |
| a13 | Gi 188252573 | C2 domain containing protein | <i>Citrus sinensis</i>      | 31.71/8.72 | 49.11/5.02 | 230 | 100 |  |
| a1  | Gi 218791092 | C2 domain containing protein | <i>Citrus clementina</i>    | 30.43/5.10 | 48.14/5.24 | 151 | 100 |  |

|                                                                 |                     |                                     |                             |                   |                   |            |            |                                                                                       |
|-----------------------------------------------------------------|---------------------|-------------------------------------|-----------------------------|-------------------|-------------------|------------|------------|---------------------------------------------------------------------------------------|
| a19                                                             | Gi 31672073         | C2 domain containing protein        | <i>Citrus trifoliata</i>    | 27.51/5.97        | 48.90/5.15        | 236        | 100        | 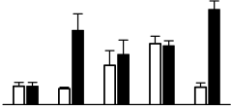   |
| a29                                                             | Gi 55289848         | Glycine rich protein 2              | <i>Citrus trifoliata</i>    | 25.33/6.34        | 18.64/6.51        | 196        | 100        |    |
| c1                                                              | Gi 188289622        | Germin-like protein, putative       | <i>Citrus sinensis</i>      | 34.15/9.23        | 28.05/6.22        | 186        | 100        |    |
| b7                                                              | Gi 116643152        | Stress-related protein              | <i>Citrus sinensis</i>      | 17.59 /5.67       | 18.58/5.74        | 315        | 100        |    |
| b11                                                             | Gi 28617273         | B-1,3-glucanase 1                   | <i>Citrus Sinensis</i>      | 30.59/5.44        | 37.12/4.98        | 155        | 100        |    |
| b5                                                              | Gi 218839004        | Constitutive disease resistance 1   | <i>Citrus clementina</i>    | 32.69/7.41        | 46.83/4.74        | 223        | 100        |   |
| <b>b8</b>                                                       | <b>Gi 209925686</b> | <b>Responsive to dehydration 21</b> | <b><i>Citrus unshiu</i></b> | <b>21.36/6.08</b> | <b>12.37/4.98</b> | <b>165</b> | <b>100</b> |  |
| <b>Hormone biosynthesis, metabolism and signal transduction</b> |                     |                                     |                             |                   |                   |            |            |                                                                                       |

|     |              |                                    |                              |             |            |     |       |                                                                                       |
|-----|--------------|------------------------------------|------------------------------|-------------|------------|-----|-------|---------------------------------------------------------------------------------------|
| a2  | Gi 56588757  | S-adenosylmethionine synthetase 2  | <i>Citrus sinensis</i>       | 30.30/9.06  | 53.96/6.03 | 262 | 100   | 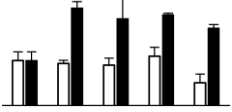   |
| a24 | Gi 75308025  | S-adenosylmethionine synthetase 1  | <i>Elaeagnus umbellata</i>   | 43.56/ 5.50 | 53.44/5.80 | 269 | 100   |    |
| b12 | Gi 728744    | Auxin-induced protein PCNT115      | <i>Nicotiana tabacum</i>     | 34.29/7.1   | 44.62/6.67 | 139 | 100   |    |
| b6  | Gi 270233805 | Auxin induced unkonwn protein      | <i>Vitis vinifera</i>        | 16.39/5.78  | 30.93/6.36 | 181 | 100   |    |
| b13 | Gi 55398044  | ARF-GAP domain 2                   | <i>Citrus sinensis</i>       | 24.29/8.2   | 22.40/5.56 | 173 | 100   |    |
| d2  | Gi 188269048 | Aldo/keto reductase family protein | <i>Citrus sinensis</i>       | 31.23/6.49  | 44.88/5.94 | 408 | 100   |   |
| c2  | Gi 62526573  | Aldo/keto reductase family protein | <i>Manihot esculenta</i>     | 38.02/ 6.38 | 44.28/6.61 | 246 | 100   |  |
| a3  | Gi 61808301  | Allene oxide cyclase               | <i>Camptotheca acuminata</i> | 27.06/8.71  | 21.41/6.26 | 86  | 99.80 |  |

|                                          |              |                                      |  |                          |            |            |     |     |                                                                                       |
|------------------------------------------|--------------|--------------------------------------|--|--------------------------|------------|------------|-----|-----|---------------------------------------------------------------------------------------|
| c4                                       | Gi 31670062  | Agmatine deiminase                   |  | <i>Citrus trifoliata</i> | 31.17/7.16 | 50.26/5.35 | 177 | 100 | 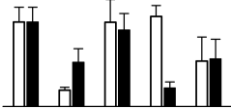   |
| <b>Protein synthesis and degradation</b> |              |                                      |  |                          |            |            |     |     |                                                                                       |
| a18                                      | Gi 13094963  | Eukaryotic elongation factor 5A-1    |  | <i>Manihot esculenta</i> | 17.82/5.6  | 16.74/5.97 | 130 | 100 |    |
| a4                                       | Gi 188298374 | Elongation factor 1-beta, putative   |  | <i>Citrus sinensis</i>   | 31.97/7.71 | 36.79/4.42 | 166 | 100 |    |
| a28                                      | Gi 28618533  | Protein kinase C inhibitor, putative |  | <i>Citrus sinensis</i>   | 23.04/9.08 | 13.58/5.94 | 118 | 100 |    |
| e6                                       | Gi 34521947  | Ubiquitin family protein             |  | <i>Citrus sinensis</i>   | 20.31/4.72 | 67.90/4.75 | 119 | 100 |    |
| d3                                       | Gi 110885389 | Ubiquitin family protein             |  | <i>Citrus clementina</i> | 43.67/7.29 | 69.02/4.55 | 137 | 100 |   |
| a14                                      | Gi 225441983 | 20S proteasome alpha subunit E2      |  | <i>Vitis vinifera</i>    | 26.13/4.65 | 28.09/4.40 | 274 | 100 |  |

|     |              |                                       |                            |            |            |     |       |                                                                                     |
|-----|--------------|---------------------------------------|----------------------------|------------|------------|-----|-------|-------------------------------------------------------------------------------------|
| a12 | Gi 188410065 | Cysteine protease, putative           | <i>Poncirus trifoliata</i> | 35.52/6.7  | 30.60/4.57 | 136 | 100   | 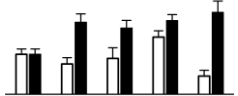 |
| a11 | Gi 188334808 | Cysteine protease, putative           | <i>Citrus sinensis</i>     | 29.94/8.36 | 31.26/4.43 | 110 | 99.99 |  |
| b9  | Gi 188278038 | Cysteine protease inhibitor, putative | <i>Citrus trifoliata</i>   | 34.43/6.77 | 25.75/6.48 | 409 | 100   |  |

### Sugar transformation and TCA

|     |              |                                    |                                  |             |            |     |     |                                                                                       |
|-----|--------------|------------------------------------|----------------------------------|-------------|------------|-----|-----|---------------------------------------------------------------------------------------|
| a21 | Gi 56528920  | Phosphoglycerate mutase, putative  | <i>Citrus sinensis</i>           | 32.18/6.79  | 71.67/5.90 | 290 | 100 | 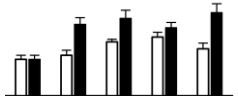   |
| a31 | Gi 188354130 | Phosphoglycerate mutase, putative  | <i>Citrus sinensis</i>           | 32.85//5.69 | 71.88/5.99 | 327 | 100 |    |
| a16 | Gi 188328322 | Enolase                            | <i>Citrus reticulata</i>         | 31.61/9.41  | 61.27/5.28 | 179 | 100 |   |
| e7  | Gi 125561648 | NAD-dependent malate dehydrogenase | <i>Oryza sativa Indica Group</i> | 41.77/7.66  | 43.36/6.03 | 115 | 100 |  |

|     |              |                                           |                |                          |            |            |     |       |                                                                                     |
|-----|--------------|-------------------------------------------|----------------|--------------------------|------------|------------|-----|-------|-------------------------------------------------------------------------------------|
| b1  | Gi 218786344 | Malate dehydrogenase (NAD), putative      | mitochondrial, | <i>Citrus clementina</i> | 29.86/9.48 | 43.42/6.14 | 119 | 100   | 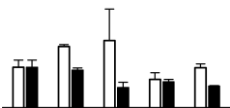 |
| b14 | Gi 110861996 | Malate dehydrogenase (NAD), putative      | mitochondrial, | <i>Citrus clementina</i> | 36.78/9.47 | 42.27/6.37 | 113 | 99.99 |  |
| b15 | Gi 114479586 | Malate dehydrogenase                      |                | <i>Citrus junos</i>      | 43.67/6.91 | 39.46/5.76 | 360 | 100   |  |
| b16 | Gi 225453490 | Malate dehydrogenase, cytosolic, putative |                | <i>Vitis vinifera</i>    | 36.24/6.4  | 43.89/6.44 | 141 | 100   |  |
| c5  | Gi 226510248 | Succinyl-coa synthetase B chain           |                | <i>Zea mays</i>          | 45.51/5.99 | 46.41/5.58 | 124 | 100   |  |

### Metabolism

|     |              |                                  |         |                          |             |            |     |     |                                                                                       |
|-----|--------------|----------------------------------|---------|--------------------------|-------------|------------|-----|-----|---------------------------------------------------------------------------------------|
| b2  | Gi 225461209 | Flavodoxin-like reductase 1      | quinone | <i>Vitis vinifera</i>    | 21.73/5.83  | 24.71/6.42 | 177 | 100 | 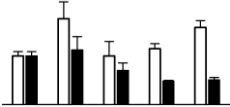 |
| a23 | Gi 188321731 | 3-phosphoglycerate dehydrogenase |         | <i>Citrus reticulata</i> | 28.67/10.14 | 65.93/6.09 | 183 | 100 |  |

|     |              |                                                            |                            |             |            |     |     |                                                                                     |
|-----|--------------|------------------------------------------------------------|----------------------------|-------------|------------|-----|-----|-------------------------------------------------------------------------------------|
| b17 | Gi 188314872 | O-acetylserine (thiol) lyase isoform C                     | <i>Citrus sinensis</i>     | 34.83/10.47 | 39.95/5.40 | 212 | 100 | 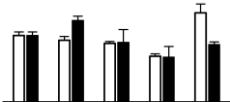 |
| b18 | Gi 224121906 | Nucleoside diphosphate kinase 2                            | <i>Populus trichocarpa</i> | 17.02/6.17  | 15.32/6.24 | 121 | 100 |  |
| b19 | Gi 63060347  | Nucleoside diphosphate kinase 1                            | <i>Citrus clementina</i>   | 26.49/9.46  | 12.92/6.11 | 241 | 100 |  |
| a5  | Gi 115472485 | Thiazole biosynthetic enzyme, chloroplast precursor (ARA6) | <i>Oryza sativa</i>        | 37.43/5.44  | 36.35/5.12 | 114 | 100 |  |

**Energy genesis and transport**

|     |              |                                     |                          |            |            |     |     |                                                                                       |
|-----|--------------|-------------------------------------|--------------------------|------------|------------|-----|-----|---------------------------------------------------------------------------------------|
| e8  | Gi 255538692 | Gamma Carbonicanhydrase 1           | <i>Ricinus communis</i>  | 29.62/5.73 | 31.64/6.45 | 128 | 100 | 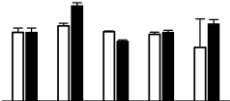   |
| a20 | Gi 192910736 | ATP synthase D chain, mitochondrial | <i>Elaeis guineensis</i> | 19.71/5.13 | 19.32/5.12 | 111 | 100 |  |
| a6  | Gi 188347714 | Vacuolar ATP synthase subunit B     | <i>Citrus sinensis</i>   | 34.76/6.19 | 65.15/5.02 | 286 | 100 |  |



|     |              |                                 |                         |            |            |     |     |                                                                                     |
|-----|--------------|---------------------------------|-------------------------|------------|------------|-----|-----|-------------------------------------------------------------------------------------|
| b20 | Gi 12585490  | Vacuolar ATP synthase subunit A | <i>Citrus unshiu</i>    | 68.28/5.29 | 45.43/5.48 | 674 | 100 | 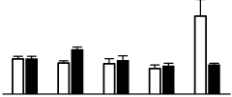 |
| a22 | Gi 188251304 | Atpase-like protein             | <i>Citrus sinensis</i>  | 32.31/9.05 | 18.03/5.65 | 220 | 100 |  |
| e9  | Gi 255554349 | 6-phosphogluconolactonase       | <i>Ricinus communis</i> | 28.11/5.44 | 30.88/4.98 | 115 | 100 |  |
| a27 | Gi 61689787  | 6-phosphogluconolactonase       | <i>Citrus sinensis</i>  | 21.88/7.63 | 32.39/5.11 | 171 | 100 |  |

### Transcriptional regulation and signal transduction

|     |              |                                  |                            |             |            |     |     |                                                                                       |
|-----|--------------|----------------------------------|----------------------------|-------------|------------|-----|-----|---------------------------------------------------------------------------------------|
| a17 | Gi 110885062 | Remorin family protein           | <i>Citrus clementina</i>   | 35.102/6.74 | 34.50/5.25 | 247 | 100 | 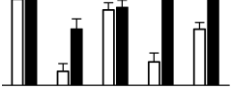   |
| b3  | Gi 224078632 | RNA-binding protein 45, putative | <i>Populus trichocarpa</i> | 42.55/5.91  | 58.11/6.27 | 139 | 100 |   |
| d4  | Gi 242089407 | Acetylglutamate kinase regulator | <i>Sorghum bicolor</i>     | 21.67/9.82  | 13.10/5.78 | 110 | 100 |  |

|                                          |              |                                                  |                          |            |            |     |       |                                                                                       |
|------------------------------------------|--------------|--------------------------------------------------|--------------------------|------------|------------|-----|-------|---------------------------------------------------------------------------------------|
| a7                                       | Gi 218803120 | Calcium-binding EF hand family protein           | <i>Citrus clementina</i> | 25.37/4.97 | 51.79/4.51 | 113 | 99.99 | 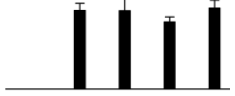   |
| <b>Cell organization/ division/cycle</b> |              |                                                  |                          |            |            |     |       |                                                                                       |
| a8                                       | Gi 62900641  | Plastid-lipid-associated protein, chloroplastic  | <i>Citrus unshiu</i>     | 35.25/5.24 | 35.24/4.38 | 337 | 100   |    |
| c6                                       | Gi 55933692  | Annexin                                          | <i>Citrus sinensis</i>   | 32.43/5.62 | 41.93/5.77 | 322 | 100   |    |
| b10                                      | Gi 255565619 | Cell division protein ftsz                       | <i>Ricinus communis</i>  | 52.55/6.73 | 54.10/5.17 | 148 | 100   |    |
| b21                                      | Gi 188396422 | Peptidyl-prolyl cis-trans isomerase, chloroplast | <i>Citrus aurantium</i>  | 19.41/9.63 | 19.26/5.88 | 116 | 100   |    |
| <b>Redox</b>                             |              |                                                  |                          |            |            |     |       |                                                                                       |
| b22                                      | Gi 270230992 | Thioredoxin m-type 4                             | <i>Vitis vinifera</i>    | 20.33/9.37 | 12.53/6.18 | 142 | 100   |  |
| a9                                       | Gi 42477789  | Ankyrin repeat -containing protein 2             | <i>Citrus sinensis</i>   | 16.29/5.27 | 49.80/4.34 | 377 | 100   |  |

|                       |              |                                          |                           |             |            |     |       |                                                                                       |
|-----------------------|--------------|------------------------------------------|---------------------------|-------------|------------|-----|-------|---------------------------------------------------------------------------------------|
| c7                    | Gi 209934640 | Peroxiredoxin type 2, putative           | <i>Citrus unshiu</i>      | 32.81/9.67  | 13.32/4.64 | 119 | 100   | 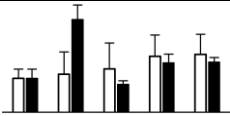   |
| <b>Photosynthesis</b> |              |                                          |                           |             |            |     |       |                                                                                       |
| c8                    | Gi 57930837  | PS II oxygen-evolving complex 1          | <i>Citrus clementina</i>  | 31.72/5.22  | 32.58/5.22 | 215 | 100   |    |
| a10                   | Gi 225440438 | Ribulose-1,5-bisphosphate carboxylase    | <i>Vitis vinifera</i>     | 48.17/6.40  | 56.60/4.83 | 112 | 100   |    |
| a15                   | Gi 115334979 | Ribulose-1,5-bisphosphate carboxylase    | <i>Acer rubrum</i>        | 47.95/7.57  | 56.17/5.01 | 375 | 100   |    |
| <b>Others</b>         |              |                                          |                           |             |            |     |       |                                                                                       |
| e4                    | Gi 55932194  | In2-1 protein, putative                  | <i>Citrus sinensis</i>    | 32.43/8.24  | 29.61/5.17 | 120 | 100   |   |
| e10                   | Gi 188284839 | Rhodanese-like domain-containing protein | <i>Citrus latifolia</i>   | 31.68/9.64  | 54.98/5.05 | 121 | 100   |  |
| c9                    | Gi 116057804 | Myosin class II heavy chain (ISS)        | <i>Ostreococcus tauri</i> | 468.49/6.17 | 14.87/6.52 | 85  | 99.79 |  |
